# Supplementary material for: Mcm2 promotes stem cell differentiation via its ability to bind H3-H4
Source: eLife journal article supplement (doi:10.7554/elife.80917), 2022-11-10
Supplement: fig2-data2 [file Figure 2-source data 2.xlsx]

## Sheet: Sheet1
Figure 2-source data 2: Oct4 and Nanog protein levels in WT and Mcm2-2A ESCs and NPCs.
	Figure 2D
