# Supplementary material for: Mcm2 promotes stem cell differentiation via its ability to bind H3-H4
Source: eLife journal article supplement (doi:10.7554/elife.80917), 2022-11-10
Supplement: fig2-data3 [file Figure 2-source data 3.xlsx]

## Sheet: Sheet1
Figure 2-source data 3: Pwpxl and Pwpxl-Mcm2 expression in WT and Mcm2-2A ES cells.
Figure 2E
