# Supplementary material for: Mcm2 promotes stem cell differentiation via its ability to bind H3-H4
Source: eLife journal article supplement (doi:10.7554/elife.80917), 2022-11-10
Supplement: fig2-figsupp2-data1 [file Figure 2-figure supplement 2-source data 1.xlsx]

## Sheet: Sheet1
Figure 2-figure supplement 2-source data 1: Pwpxl-Asf1a expression and Asf1a KO detection in WT and Mcm2-2A ES cells.
Figure 2-figure supplement 2A							Figure 2-figure supplement 2G
