# Supplementary material for: Mcm2 promotes stem cell differentiation via its ability to bind H3-H4
Source: eLife journal article supplement (doi:10.7554/elife.80917), 2022-11-10
Supplement: fig4-data1 [file Figure 4-source data 1.xlsx]

## Sheet: Sheet1
Figure4-source data1: H3K4me3, H3K27me3, Ezh2, Mcm2, Oct4 and Nanog protein levels in WT and Mcm2-2A ESCs and NPCs.
Figure 4A
