# Supplementary material for: Mcm2 promotes stem cell differentiation via its ability to bind H3-H4
Source: eLife. 2022 Nov 10;11:e80917. doi: 10.7554/eLife.80917 (PMC9681210; doi:10.7554/eLife.80917)
Supplement: Figure 1—figure supplement 1—source data 1. [file elife-80917-fig1-figsupp1-data1.xlsx]

## Sheet: Sheet1
Figure1-figure supplement 1-source data 1: Relative mRNA level of pluripotency and lineage specific genes during EB formation in WT, Pole4 KO, Pole4 KO, Mcm2-2A, Mcm2-2A+Pole3 KO and Mcm2-2A+Pole4 KO cells.
Figure1-figure supplement 1B
Oct4	WT			Pole3 ko			Pole4 ko			Mcm2-2A			Mcm2-2A+Pole3 ko			Mcm2-2A+Pole4 ko
D0	1	1	1	1	1	1	1	1	1	1	1	1	1	1	1	1	1	1
D3	1.05702	0.920188	0.895025	0.641713	0.687771	0.784584	0.876606	0.619854	0.972655	0.913831	0.61132	0.619854	0.80107	0.795536	0.784584	0.737135	0.528509	0.858565
D6	0.0358968	0.129408	0.0356489	0.496546	0.20733	0.566442	0.0836205	0.432269	0.41466	0.281265	0.397768	0.543367	0.566442	0.641713	0.795536	0.479632	0.61132	0.790041
D9	0.0448111	0.0339605	0.0356489	0.314253	0.115824	0.257028	0.151774	0.267943	0.417544	0.0785633	0.0830429	0.366021	0.624165	0.742776	0.757858	0.50698	0.558644	0.76313
Gata4	WT			Pole3 ko			Pole4 ko			Mcm2-2A			Mcm2-2A+Pole3 ko			Mcm2-2A+Pole4 ko
D0	1	1	1	1	1	1	1	1	1	1	1	1	1	1	1	1	1	1
D3	3.36	1.91853	2.18859	1.60938	2.60268	1.19748	2.93706	1.26576	2.04202	1.125	1.31951	0.521233	1.24026	1.68179	1.23971	1.08075	0.574349	1.85318
D6	41.64	36.76	45.2548	20.3047	20.393	16.5642	17.3147	12.8171	27.2843	7.93981	7.31065	5.61778	9.04545	7.1602	13.8326	9.73292	4.65948	13.737
D9	48.5	40.39	49.8665	8.96094	12.5533	10.4831	19.8881	8.33973	15.3482	3.7037	2.92817	4.37717	4.46104	4.59798	6.63456	2.57143	2.04202	10.9283
Brachyury	WT			Pole3 ko			Pole4 ko			Mcm2-2A			Mcm2-2A+Pole3 ko			Mcm2-2A+Pole4 ko
D0	1	1	1	1	1	1	1	1	1	1	1	1	1	1	1	1	1	1
D3	56.493	75.5835	80.4489	70.0348	85.0359	57.68	284.05	30.0647	53.8174	34.0598	6.82108	6.40856	11.5514	11.3137	18.507	8.1681	10.2674	22.4711
D6	13.3614	61.8199	30.6965	263.197	103.968	302.334	38.8542	121.938	186.108	382.681	259.574	168.897	36.5044	33.1285	64.8934	35.0174	53.8174	57.68
D9	3.63008	4.69134	7.94474	146.018	38.3193	188.706	47.8352	106.891	213.783	205.074	270.597	237.207	54.9482	90.5724	104.691	95.0095	164.279	76.6386
Nestin	WT			Pole3 ko			Pole4 ko			Mcm2-2A			Mcm2-2A+Pole3 ko			Mcm2-2A+Pole4 ko
D0	1	1	1	1	1	1	1	1	1	1	1	1	1	1	1	1	1	1
D3	4.34694	4.82323	2.65737	2.54912	4.25748	1.91853	4.53154	1.44393	2.44528	3.41054	2.36199	1.31951	1.3566	1.05702	1.07923	0.965936	0.697372	1.72907
D6	3.01049	6.82108	2.60268	4.78991	4.78991	4.19887	3.97237	3.16017	3.34035	5.16941	6.36429	5.42642	2.65737	1.98618	3.16017	1.68179	2.62079	4.69134
D9	19.1597	12.2101	16.4498	6.36429	26.1729	9.18959	23.2636	6.6807	7.94474	22.9433	14.3204	8.57419	2.11404	2.464	2.42839	1.67018	2.17347	3.24901
Cdx2	WT			Pole3 ko			Pole4 ko			Mcm2-2A			Mcm2-2A+Pole3 ko			Mcm2-2A+Pole4 ko
D0	1	1	1	1	1	1	1	1	1	1	1	1	1	1	1	1	1	1
D3	5.9	13.9288	6.19026	2.13223	3.97237	2.60268	4.97315	2.11404	3.13834	4.43103	2.63902	0.993092	1.08609	1.21419	2.39496	1.12037	1.70527	2.67586
D6	32.45	57.2816	54.9482	9.61157	15.1369	17.8766	17.2013	13.1775	12.3805	26.2759	14.6213	6.63456	1.50993	0.817902	2.17347	1.7037	4.50023	2.39496
D9	4.86	8.9383	4.99332	17.0909	13.6422	47.5048	5.75168	20.1122	36.2523	57.9138	35.7532	30.2738	2.4702	2.77214	6.45313	3.80556	8.57419	8.75435
