# Supplementary material for: Mcm2 promotes stem cell differentiation via its ability to bind H3-H4
Source: eLife. 2022 Nov 10;11:e80917. doi: 10.7554/eLife.80917 (PMC9681210; doi:10.7554/eLife.80917)
Supplement: Figure 1—source data 1. [file elife-80917-fig1-data1.xlsx]

## Sheet: Sheet1
Figure1-source data 1: Relative mRNA level of pluripotency and lineage specific genes during EB formation, and 2C-like ratio in WT and Mcm2-2A ESCs.
Figure 1C								Figure 1E
Oct4	WT			Mcm2-2A				Rep1	Total	MERVL-gag positive	2C like cell ratio (%)
D0	1	1	1	1	1	1		WT	549	6	1.0929
D3	1.05702	0.920188	0.895025	0.913831	0.61132	0.619854		Mcm2-2A	569	6	1.05448
D6	0.0358968	0.129408	0.0356489	0.281265	0.397768	0.543367
D9	0.0448111	0.0339605	0.0356489	0.0785633	0.0830429	0.366021
	Rep1	Rep2	Rep3	Rep1	Rep2	Rep3		Rep2
								WT	543	7	1.28913
Gata4	WT			Mcm2-2A				Mcm2-2A	550	8	1.45455
D0	1	1	1	1	1	1
D3	3.36	1.91853	2.18859	1.125	1.31951	0.521233
D6	41.64	36.76	45.2548	7.93981	7.31065	5.61778		Rep3
D9	48.5	40.39	49.8665	3.7037	2.92817	4.37717		WT	599	7	1.16861
	Rep1	Rep2	Rep3	Rep1	Rep2	Rep3		Mcm2-2A	601	7	1.16473
Cdx2	WT			Mcm2-2A
D0	1	1	1	1	1	1
D3	5.9	13.9288	6.19026	4.43103	2.63902	0.993092
D6	32.45	57.2816	54.9482	26.2759	14.6213	6.63456
D9	4.86	8.9383	4.99332	57.9138	35.7532	30.2738
	Rep1	Rep2	Rep3	Rep1	Rep2	Rep3
Brachyury	WT			Mcm2-2A
D0	1	1	1	1	1	1
D3	56.493	75.5835	80.4489	34.0598	6.82108	6.40856
D6	13.3614	61.8199	30.6965	382.681	259.574	168.897
D9	3.63008	4.69134	7.94474	205.074	270.597	237.207
	Rep1	Rep2	Rep3	Rep1	Rep2	Rep3
