# Supplementary material for: Mcm2 promotes stem cell differentiation via its ability to bind H3-H4
Source: eLife. 2022 Nov 10;11:e80917. doi: 10.7554/eLife.80917 (PMC9681210; doi:10.7554/eLife.80917)
Supplement: Figure 2—figure supplement 1—source data 1. [file elife-80917-fig2-figsupp1-data1.xlsx]

## Sheet: Sheet1
Figure 2-figure supplement 1-source data 1: Relative mRNA level of pluripotency and lineage specific genes during neural differentiation in WT, Pole4 KO and Mcm2-2A+Pole4 KO cells.
Figure2-figure supplement 1A
Oct4	ESC			NPC
WT	1	1	1	0.16	0.11	0.11
Pole4 KO	0.93	0.83	0.91	0.28	0.13	0.13
Mcm2-2A+Pole4 KO	1.02	0.81	0.81	0.75	0.8	0.91
	Rep1	Rep2	Rep3	Rep1	Rep2	Rep3
Pax6	ESC			NPC
WT	1	1	1	10.56	21.26	14.72
Pole4 KO	1.13	1.27	1.18	8.17	10.78	11.31
Mcm2-2A+Pole4 KO	0.85	0.8	0.54	3.51	2.95	2.28
	Rep1	Rep2	Rep3	Rep1	Rep2	Rep3
Sox21	ESC			NPC
WT	1	1	1	15.78	26.91	23.1
Pole4 KO	0.82	0.9	1.16	12.64	11.16	16.45
Mcm2-2A+Pole4 KO	1.14	0.85	1.36	3.41	1.6	4.17
	Rep1	Rep2	Rep3	Rep1	Rep2	Rep3
