# Supplementary material for: Mcm2 promotes stem cell differentiation via its ability to bind H3-H4
Source: eLife. 2022 Nov 10;11:e80917. doi: 10.7554/eLife.80917 (PMC9681210; doi:10.7554/eLife.80917)
Supplement: Figure 2—figure supplement 2—source data 2. [file elife-80917-fig2-figsupp2-data2.xlsx]

## Sheet: Sheet1
Figure 2-figure supplement 2-source data 2: Relative mRNA level of pluripotency and lineage specific genes during neural differentiation in Asf1a rescued or Asf1a KO cells.
Figure2-figure supplement 2C
								Figure2-figure supplement 2I
Oct4	ESC			NPC
WT+EV	1	1	1	0.076415	0.0473661	0.0780207		Oct4	ESC			NPC
WT+Asf1a	1.05702	1.08673	0.959264	0.0571145	0.0518325	0.0769465		WT	1	1	1	0.0638133	0.0366511	0.077482
2A+EV	1.10957	1.03526	0.882703	0.251739	0.356013	0.291183		Mcm2-2A	0.926588	1.12506	0.920188	0.309927	0.19751	0.230047
2A+Asf1a	0.993092	1.04247	0.90125	0.222211	0.283221	0.275476		Asf1a KO #1	0.858565	0.864537	0.846745	0.0240137	0.014885	0.034197
	Rep1	Rep2	Rep3	Rep1	Rep2	Rep3		Asf1a KO #2	1.02101	0.882703	1.06437	0.0153034	0.014082	0.034674
								Mcm2-2A+Asf1a KO #1	0.926588	0.972655	0.972655	0.25	0.271684	0.283221
Figure2-figure supplement 2D								Mcm2-2A+Asf1a KO #2	0.939523	1.01396	0.959264	0.329877	0.185565	0.190782
									Rep1	Rep2	Rep3	Rep1	Rep2	Rep3
Pax6	ESC			NPC
WT+EV	1	1	1	14.42	13.1775	13.6422
WT+Asf1a	0.840896	0.90125	0.80107	12.7286	14.1232	15.455		Pax6	ESC			NPC
2A+EV	0.993092	0.858565	1.02101	4.62675	3.89062	4.22807		WT	1	1	1	14.8254	10.8528	13.2691
2A+Asf1a	0.757858	0.952638	0.870551	5.24157	3.97237	4.82323		Mcm2-2A	0.986233	0.870551	0.933033	5.20537	2.42839	2.49666
	Rep1	Rep2	Rep3	Rep1	Rep2	Rep3		Asf1a KO #1	1.07177	0.840896	0.920188	7.21	5.16941	4.99332
								Asf1a KO #2	0.97942	1.03526	0.90125	9.71356	5.85634	6.40856
Figure2-figure supplement 2E								Mcm2-2A+Asf1a KO #1	0.852635	0.90125	0.920188	2.94854	1.76541	1.84038
								Mcm2-2A+Asf1a KO #2	0.742262	0.80107	0.913831	1.93187	2.14355	3.01049
Sox21	ESC			NPC					Rep1	Rep2	Rep3	Rep1	Rep2	Rep3
WT+EV	1	1	1	18.6357	20.6776	14.3204
WT+Asf1a	0.920188	0.840896	0.768438	15.8895	19.2929	16
2A+EV	0.926588	0.773782	0.907519	3.01049	2.41162	3.20428
2A+Asf1a	0.907519	0.82932	0.933033	2.71321	2.58471	4.46915		Sox21	ESC			NPC
	Rep1	Rep2	Rep3	Rep1	Rep2	Rep3		WT	1	1	1	14.723	18.7654	15.455
								Mcm2-2A	0.959264	1.00696	1.00696	2.65737	2.09943	2.94854
								Asf1a KO #1	1.01396	0.90125	0.806642	5.24157	2.53151	3.68075
								Asf1a KO #2	1.03526	1.05702	0.933033	3.36359	3.73213	3.43426
								Mcm2-2A+Asf1a KO #1	1.03526	1.02811	0.993092	3.11666	1.64718	1.77768
								Mcm2-2A+Asf1a KO #2	0.939523	1.00696	0.97942	2.60268	1.68179	1.68179
									Rep1	Rep2	Rep3	Rep1	Rep2	Rep3
								Zfpm2	ESC			NPC
								WT	1	1	1	5.46416	7.11074	5.46416
								Mcm2-2A	0.876606	1.09429	1.07177	4.95883	5.16941	5.20537
								Asf1a KO #1	1.21419	1.1487	0.82932	1.58008	2.53151	2.09943
								Asf1a KO #2	0.870551	0.959264	0.933033	1.27456	2.88786	2.62079
								Mcm2-2A+Asf1a KO #1	1.32869	0.858565	1.23971	5.77572	6.82108	4.65893
								Mcm2-2A+Asf1a KO #2	0.965936	1.07923	1.02811	4.82323	4.02782	5.09824
