# Supplementary material for: Mcm2 promotes stem cell differentiation via its ability to bind H3-H4
Source: eLife. 2022 Nov 10;11:e80917. doi: 10.7554/eLife.80917 (PMC9681210; doi:10.7554/eLife.80917)
Supplement: Figure 2—source data 1. [file elife-80917-fig2-data1.xlsx]

## Sheet: Sheet1
Figure 2-source data 1: Relative mRNA level of pluripotency and lineage specific genes, and Oct4 enhancer driven EGFP positive cells ratio during neural differentiation in WT and Mcm2-2A cells.
Figure 2A								Figure 2C
Oct4	ESC			NPC					WT			Mcm2-2A
WT	1	1	1	0.14	0.17	0.11		Day2	99.35	99.63	97.03	99.21	99.3	98.21
Mcm2-2A	1.07	1.04	0.88	0.4	0.42	0.33		Day5	72.47	61.85	72.63	73.89	61.98	74.35
	Rep1	Rep2	Rep3	Rep1	Rep2	Rep3		Day6	60.06	51.91	58.96	63.09	54.59	62.93
								Day7	22.75	20.23	38.16	55.75	49.52	56.9
Nanog	ESC			NPC				Day8	8.22	5.45	8.22	38.28	40.69	38.28
WT	1	1	1	0.138696	0.190782	0.193446		Day9	4.01	3.56	5.91	34.74	36.86	28.32
Mcm2-2A	0.913831	1.27456	1.04247	0.392292	0.594604	0.336808
	Rep1	Rep2	Rep3	Rep1	Rep2	Rep3			Rep1	Rep2	Rep3	Rep1	Rep2	Rep3
Pax6	ESC			NPC
WT	1	1	1	14.72	17.63	18.38
Mcm2-2A	0.78	0.87	0.82	5.86	4.06	4.47
	Rep1	Rep2	Rep3	Rep1	Rep2	Rep3
Sox21	ESC			NPC
WT	1	1	1	26.91	23.1	22.94
Mcm2-2A	0.81	1.3	0.95	1.66	4.72	2.28
	Rep1	Rep2	Rep3	Rep1	Rep2	Rep3
