# Supplementary material for: Mcm2 promotes stem cell differentiation via its ability to bind H3-H4
Source: eLife. 2022 Nov 10;11:e80917. doi: 10.7554/eLife.80917 (PMC9681210; doi:10.7554/eLife.80917)
Supplement: Figure 2—source data 4. [file elife-80917-fig2-data4.xlsx]

## Sheet: Sheet1
Figure 2-source data 4: Relative mRNA level of pluripotency and lineage specific genes in Mcm2 rescued WT and Mcm2-2A mutant cells.
Figure 2G
Oct4	ESC			NPC
WT+EV	1	1	1	0.076415	0.0473661	0.0780207
WT+Mcm2	0.846745	1.1487	0.959264	0.0688691	0.0688691	0.0575117
2A+EV	1.10957	1.03526	0.882703	0.251739	0.356013	0.291183
2A+Mcm2	0.876606	1.09429	0.946058	0.108067	0.0774817	0.125
	Rep1	Rep2	Rep3	Rep1	Rep2	Rep3
Pax6	ESC			NPC
WT+EV	1	1	1	14.42	13.1775	13.6422
WT+Mcm2	1.00696	0.913831	1.01396	15.8895	12.996	13.0864
2A+EV	0.993092	0.858565	1.02101	4.62675	3.89062	4.22807
2A+Mcm2	0.920188	1.10957	1.18921	9.71356	8.63383	11.1579
	Rep1	Rep2	Rep3	Rep1	Rep2	Rep3
Sox21	ESC			NPC
WT+EV	1	1	1	18.6357	20.6776	14.3204
WT+Mcm2	0.90125	0.926588	0.846745	18.3792	17.7531	12.042
2A+EV	0.926588	0.773782	0.907519	3.01049	2.41162	3.20428
2A+Mcm2	0.959264	1.22264	1.01396	11.5514	10.0561	10.6295
	Rep1	Rep2	Rep3	Rep1	Rep2	Rep3
